# Supplementary material for: Selection and Validation of Reference Genes for Gene Expression in Bactericera gobica Loginova under Different Insecticide Stresses
Source: MDPI journal article supplement (doi:10.3390/ijms25042434), 2024-02-19
Supplement: s1 [file s1]

# **Selection and Validation of Reference Genes for Gene Expression in *Bactericera gobica* Loginova Under different Insecticide Stresses**

Hongshuang Wei <sup>1</sup>, Jingyi Zhang <sup>1</sup>, Mengke Yang <sup>1</sup>, Yao Li <sup>1</sup>, Kun Guo <sup>1</sup>, Haili Qiao <sup>1</sup>,  
Rong Xu <sup>1</sup>, Sai Liu <sup>1,\*</sup>, and Changqing Xu <sup>1,\*</sup>

1 Institute of Medicinal Plant Development, Chinese Academy of Medical Sciences  
and Peking Union Medical College, Beijing, 100193, China

\* Correspondence: cqxu@implad.ac.cn

**Table S1. Best BLAST hits for candidate reference genes and target gene identified in the transcriptome database of *Bactericera gobica* adults and nymphs.**

| Gene name               | transcriptome ID      | Leng<br>th | aa  | Complete<br>ORF | Description                                                                | E value   | Identity<br>(%) | Accession      |
|-------------------------|-----------------------|------------|-----|-----------------|----------------------------------------------------------------------------|-----------|-----------------|----------------|
| <b>Reference genes:</b> |                       |            |     |                 |                                                                            |           |                 |                |
| <i>β-actin</i>          | TRINITY_DN1329_c16_g1 | 1508       | 337 | Y               | Actin 1 [ <i>Laodelphax striatellus</i> ]                                  | 0         | 98.67%          | AGJ84696.1     |
| <i>EF1α</i>             | TRINITY_DN5961_c2_g1  | 2703       | 325 | Y               | elongation factor 1 alpha [ <i>Bactericera cockerelli</i> ]                | 0         | 99.03%          | ALX81339.1     |
| <i>EF2</i>              | TRINITY_DN8489_c0_g3  | 4520       | 844 | Y               | PREDICTED: translation elongation factor 2 [ <i>Neodiprion lecontei</i> ]  | 0         | 93.84%          | XP_015509932.1 |
| <i>GAPDH</i>            | TRINITY_DN1344_c7_g3  | 1936       | 332 | Y               | glyceraldehyde-3-phosphate dehydrogenase [ <i>Bactericera cockerelli</i> ] | 0         | 98.80%          | ALX81341.1     |
| <i>α-TUB</i>            | TRINITY_DN999_c1_g1   | 1328       | 360 | 3'lost          | tubulin alpha-1 chain-like [ <i>Diaphorina citri</i> ]                     | 0         | 97.78%          | XP_008480775.1 |
| <i>β-TUB</i>            | TRINITY_DN22746_c0_g1 | 3072       | 447 | Y               | tubulin beta-1 chain [ <i>Diaphorina citri</i> ]                           | 0         | 99.11%          | XP_008480683.1 |
| <i>Ferritin</i>         | TRINITY_DN1667_c1_g1  | 4196       | 239 | Y               | ferritin heavy chain-like precursor [ <i>Diaphorina citri</i> ]            | 3.00E-98  | 62.35%          | NP_001316112.1 |
| <i>GST</i>              | TRINITY_DN13130_c0_g2 | 1495       | 216 | Y               | glutathione S-transferase 1-like [ <i>Diaphorina citri</i> ]               | 2.00E-148 | 93.98%          | XP_026680107.1 |
| <i>AK</i>               | TRINITY_DN9312_c5_g1  | 3070       | 259 | Y               | arginine kinase isoform X2 [ <i>Diaphorina citri</i> ]                     | 8.00E-175 | 91.41%          | XP_026680842.1 |
| <i>RPL8</i>             | TRINITY_DN7930_c5_g1  | 1301       | 200 | Y               | 60S ribosomal protein L8 [ <i>Diaphorina citri</i> ]                       | 1.00E-139 | 97.50%          | XP_008478127.1 |
| <i>RPL10</i>            | TRINITY_DN207_c11_g1  | 1605       | 219 | Y               | 60S ribosomal protein L10 isoform X4 [ <i>Diaphorina citri</i> ]           | 2.00E-151 | 94.52%          | XP_008471214.1 |
| <i>RPL32</i>            | TRINITY_DN7277_c2_g1  | 1090       | 134 | Y               | 60S ribosomal protein L32-like [ <i>Diaphorina citri</i> ]                 | 3.00E-91  | 99.25%          | XP_008468712.1 |
| <i>RPS11</i>            | TRINITY_DN35443_c0_g1 | 670        | 152 | Y               | 40S ribosomal protein S11 isoform X3                                       | 9.00E-105 | 98.03%          | XP_008470793.1 |

|               |                       |      |     |   |                                                                                        |          |        |                |
|---------------|-----------------------|------|-----|---|----------------------------------------------------------------------------------------|----------|--------|----------------|
| <i>RPS15</i>  | TRINITY_DN24856_c0_g1 | 1046 | 130 | Y | [ <i>Diaphorina citri</i> ]<br>40S ribosomal protein S15Aa [ <i>Diaphorina citri</i> ] | 2.00E-88 | 99.23% | NP_001284622.1 |
| <i>RPS20</i>  | TRINITY_DN12526_c3_g1 | 554  | 131 | Y | 40S ribosomal protein S20 [ <i>Diaphorina citri</i> ]                                  | 7.00E-83 | 96.18% | XP_008476677.1 |
| Target gene:  |                       |      |     |   |                                                                                        |          |        |                |
| <i>CYP6a1</i> | TRINITY_DN4781_c0_g1  | 3341 | 585 | Y | cytochrome P450 CYP6a1 [ <i>Diaphorina citri</i> ]                                     | 0        | 77.49% | QBQ34510.1     |

**Table S2. Mean Ct values  $\pm$  SE of the studied reference genes in the different samples from *Bactericera gobica*.**

| Gene name                       | Insecticide treatment | Temperature treatment | Odor stimulation | Developmental stages | Sex              | All samples      |
|---------------------------------|-----------------------|-----------------------|------------------|----------------------|------------------|------------------|
| <i><math>\beta</math>-actin</i> | 20.64 $\pm$ 0.47      | 17.33 $\pm$ 0.00      | 16.74 $\pm$ 0.05 | 17.22 $\pm$ 0.30     | 17.34 $\pm$ 0.00 | 18.34 $\pm$ 0.30 |
| <i>EF1<math>\alpha</math></i>   | 20.33 $\pm$ 0.26      | 17.74 $\pm$ 0.09      | 16.73 $\pm$ 0.12 | 17.57 $\pm$ 0.29     | 17.23 $\pm$ 0.09 | 18.37 $\pm$ 0.24 |
| <i>EF2</i>                      | 22.14 $\pm$ 0.26      | 20.15 $\pm$ 0.09      | 20.01 $\pm$ 0.07 | 20.17 $\pm$ 0.28     | 19.31 $\pm$ 0.21 | 20.69 $\pm$ 0.19 |
| <i>Ferritin</i>                 | 22.68 $\pm$ 0.37      | 21.17 $\pm$ 0.14      | 20.05 $\pm$ 0.13 | 20.75 $\pm$ 0.32     | 19.49 $\pm$ 0.05 | 21.21 $\pm$ 0.22 |
| <i>GAPDH</i>                    | 21.70 $\pm$ 0.23      | 19.65 $\pm$ 0.13      | 18.58 $\pm$ 0.08 | 19.80 $\pm$ 0.44     | 18.20 $\pm$ 0.15 | 20.03 $\pm$ 0.23 |
| <i><math>\alpha</math>-TUB</i>  | 26.96 $\pm$ 0.23      | 25.54 $\pm$ 0.32      | 20.79 $\pm$ 0.21 | 25.11 $\pm$ 1.33     | 21.04 $\pm$ 0.27 | 24.69 $\pm$ 0.46 |
| <i><math>\beta</math>-TUB</i>   | 23.92 $\pm$ 0.16      | 23.88 $\pm$ 0.48      | 22.05 $\pm$ 0.22 | 21.24 $\pm$ 0.16     | 21.38 $\pm$ 0.17 | 22.38 $\pm$ 0.21 |

|              |                  |                  |                  |                  |                  |                  |
|--------------|------------------|------------------|------------------|------------------|------------------|------------------|
| <i>AK</i>    | $21.08 \pm 0.35$ | $20.82 \pm 0.15$ | $18.95 \pm 0.14$ | $21.41 \pm 0.76$ | $18.77 \pm 0.06$ | $20.50 \pm 0.25$ |
| <i>GST</i>   | $21.65 \pm 0.39$ | $20.41 \pm 0.31$ | $20.57 \pm 0.30$ | $20.62 \pm 0.31$ | $19.55 \pm 0.07$ | $20.77 \pm 0.19$ |
| <i>RPL8</i>  | $20.36 \pm 0.22$ | $20.32 \pm 0.14$ | $19.03 \pm 0.05$ | $19.50 \pm 0.34$ | $18.17 \pm 0.07$ | $19.71 \pm 0.16$ |
| <i>RPL10</i> | $18.22 \pm 0.41$ | $19.08 \pm 0.18$ | $19.83 \pm 0.14$ | $20.20 \pm 0.18$ | $19.87 \pm 0.15$ | $19.22 \pm 0.19$ |
| <i>RPL32</i> | $19.44 \pm 0.31$ | $20.98 \pm 0.11$ | $28.10 \pm 0.57$ | $31.44 \pm 0.49$ | $22.35 \pm 0.09$ | $23.69 \pm 0.72$ |
| <i>RPS11</i> | $20.86 \pm 0.59$ | $20.89 \pm 0.16$ | $20.05 \pm 0.34$ | $20.21 \pm 0.23$ | $19.40 \pm 0.10$ | $20.43 \pm 0.23$ |
| <i>RPS15</i> | $19.80 \pm 0.36$ | $18.96 \pm 0.17$ | $20.06 \pm 0.21$ | $20.10 \pm 0.34$ | $18.88 \pm 0.04$ | $19.60 \pm 0.16$ |
| <i>RPS20</i> | $22.10 \pm 0.63$ | $21.50 \pm 0.29$ | $19.84 \pm 0.27$ | $21.06 \pm 0.28$ | $20.56 \pm 0.06$ | $21.27 \pm 0.26$ |

Note: mean $\pm$ SE.

**Table S3. Expression stability ranking of 15 candidate RGs was calculated using Delta Ct, GeNorm and NormFinder and BestKeeper under five different insecticide stresses. The average expression stability (M value,) is listed by Delta Ct, GeNorm and NormFinder analysis, and standard deviation (SD) and coefficient of variation (CV) were given by BestKeeper analysis (the lower, the most stable).**

**The stability decreased from top to bottom.**

| Rank         | Delta Ct method |   | NormFinder |   | Genorm |   | BestKeeper |    |    |
|--------------|-----------------|---|------------|---|--------|---|------------|----|----|
|              | Gene            | M | Gene       | M | Gene   | M | Gene       | SD | CV |
| Imidacloprid |                 |   |            |   |        |   |            |    |    |

|    |                                 |      |                                 |      |                                 |      |                                 |      |      |
|----|---------------------------------|------|---------------------------------|------|---------------------------------|------|---------------------------------|------|------|
| 1  | <i>GST</i>                      | 0.07 | <i>AK</i>                       | 0.00 | <i>AK</i>                       | 0.00 | <i>RPL10</i>                    | 0.01 | 0.04 |
| 2  | <i>RPS15</i>                    | 0.07 | <i>RPL10</i>                    | 0.00 | <i>RPL10</i>                    | 0.00 | <i>AK</i>                       | 0.01 | 0.04 |
| 3  | <i>RPL10</i>                    | 0.07 | <i>RPS15</i>                    | 0.00 | <i>RPS15</i>                    | 0.00 | <i>RPS15</i>                    | 0.01 | 0.06 |
| 4  | <i>AK</i>                       | 0.07 | <i>GST</i>                      | 0.01 | <i>GST</i>                      | 0.01 | <i>GAPDH</i>                    | 0.02 | 0.07 |
| 5  | <i>GAPDH</i>                    | 0.07 | <i>GAPDH</i>                    | 0.02 | <i>GAPDH</i>                    | 0.02 | <i>GST</i>                      | 0.02 | 0.09 |
| 6  | <i>RPS20</i>                    | 0.09 | <i>RPS20</i>                    | 0.04 | <i>RPS20</i>                    | 0.04 | <i><math>\alpha</math>-TUB</i>  | 0.03 | 0.10 |
| 7  | <i>EF2</i>                      | 0.09 | <i>EF2</i>                      | 0.05 | <i>EF2</i>                      | 0.05 | <i>EF2</i>                      | 0.03 | 0.16 |
| 8  | <i>EF1<math>\alpha</math></i>   | 0.09 | <i>EF1<math>\alpha</math></i>   | 0.05 | <i>EF1<math>\alpha</math></i>   | 0.05 | <i>EF1<math>\alpha</math></i>   | 0.03 | 0.17 |
| 9  | <i><math>\alpha</math>-TUB</i>  | 0.10 | <i><math>\alpha</math>-TUB</i>  | 0.05 | <i><math>\alpha</math>-TUB</i>  | 0.05 | <i>RPS20</i>                    | 0.05 | 0.25 |
| 10 | <i>RPL8</i>                     | 0.12 | <i>RPL8</i>                     | 0.10 | <i>RPL8</i>                     | 0.10 | <i>Ferritin</i>                 | 0.08 | 0.39 |
| 11 | <i>RPS11</i>                    | 0.12 | <i>RPS11</i>                    | 0.10 | <i>RPS11</i>                    | 0.10 | <i>RPL8</i>                     | 0.09 | 0.45 |
| 12 | <i><math>\beta</math>-TUB</i>   | 0.15 | <i>Ferritin</i>                 | 0.13 | <i>Ferritin</i>                 | 0.13 | <i>RPS11</i>                    | 0.09 | 0.45 |
| 13 | <i>Ferritin</i>                 | 0.15 | <i><math>\beta</math>-TUB</i>   | 0.14 | <i><math>\beta</math>-TUB</i>   | 0.14 | <i><math>\beta</math>-TUB</i>   | 0.11 | 0.49 |
| 14 | <i>RPL32</i>                    | 0.16 | <i>RPL32</i>                    | 0.14 | <i>RPL32</i>                    | 0.14 | <i>RPL32</i>                    | 0.11 | 0.58 |
| 15 | <i><math>\beta</math>-actin</i> | 0.20 | <i><math>\beta</math>-actin</i> | 0.19 | <i><math>\beta</math>-actin</i> | 0.19 | <i><math>\beta</math>-actin</i> | 0.12 | 0.61 |

**Thiamethoxam**

|   |              |      |              |      |               |      |              |      |      |
|---|--------------|------|--------------|------|---------------|------|--------------|------|------|
| 1 | <i>RPL10</i> | 0.09 | <i>RPL10</i> | 0.01 | <i>GAPDH</i>  | 0.01 | <i>AK</i>    | 0.01 | 0.03 |
| 2 | <i>RPS11</i> | 0.09 | <i>AK</i>    | 0.02 | <i> RPS15</i> | 0.01 | <i>RPL10</i> | 0.01 | 0.07 |

|    |                                 |      |                                 |      |                                 |      |                                 |      |      |
|----|---------------------------------|------|---------------------------------|------|---------------------------------|------|---------------------------------|------|------|
| 3  | <i>AK</i>                       | 0.09 | <i>RPS11</i>                    | 0.02 | <i>RPS11</i>                    | 0.01 | <i>RPS11</i>                    | 0.01 | 0.07 |
| 4  | <i>RPS15</i>                    | 0.10 | <i>RPS15</i>                    | 0.04 | <i>AK</i>                       | 0.02 | <i>GAPDH</i>                    | 0.02 | 0.10 |
| 5  | <i>GAPDH</i>                    | 0.10 | <i>GAPDH</i>                    | 0.05 | <i>RPL10</i>                    | 0.03 | <i>RPS15</i>                    | 0.02 | 0.10 |
| 6  | <i><math>\beta</math>-actin</i> | 0.10 | <i><math>\beta</math>-actin</i> | 0.05 | <i>EF1<math>\alpha</math></i>   | 0.03 | <i>EF1<math>\alpha</math></i>   | 0.03 | 0.15 |
| 7  | <i>EF1<math>\alpha</math></i>   | 0.11 | <i>EF1<math>\alpha</math></i>   | 0.07 | <i><math>\beta</math>-actin</i> | 0.05 | <i><math>\beta</math>-actin</i> | 0.05 | 0.25 |
| 8  | <i>RPS20</i>                    | 0.12 | <i>RPS20</i>                    | 0.08 | <i><math>\beta</math>-TUB</i>   | 0.05 | <i><math>\beta</math>-TUB</i>   | 0.06 | 0.24 |
| 9  | <i><math>\beta</math>-TUB</i>   | 0.12 | <i><math>\beta</math>-TUB</i>   | 0.08 | <i>RPS20</i>                    | 0.07 | <i>GST</i>                      | 0.07 | 0.34 |
| 10 | <i>GST</i>                      | 0.13 | <i>GST</i>                      | 0.09 | <i>GST</i>                      | 0.08 | <i>RPS20</i>                    | 0.08 | 0.40 |
| 11 | <i>RPL32</i>                    | 0.15 | <i>RPL32</i>                    | 0.14 | <i>RPL32</i>                    | 0.09 | <i>EF2</i>                      | 0.09 | 0.42 |
| 12 | <i>EF2</i>                      | 0.16 | <i>EF2</i>                      | 0.14 | <i>RPL8</i>                     | 0.10 | <i>RPL8</i>                     | 0.11 | 0.57 |
| 13 | <i>RPL8</i>                     | 0.16 | <i>RPL8</i>                     | 0.15 | <i><math>\alpha</math>-TUB</i>  | 0.11 | <i>Ferritin</i>                 | 0.12 | 0.55 |
| 14 | <i><math>\alpha</math>-TUB</i>  | 0.17 | <i><math>\alpha</math>-TUB</i>  | 0.16 | <i>EF2</i>                      | 0.12 | <i>RPL32</i>                    | 0.12 | 0.66 |
| 15 | <i>Ferritin</i>                 | 0.20 | <i>Ferritin</i>                 | 0.20 | <i>Ferritin</i>                 | 0.13 | <i><math>\alpha</math>-TUB</i>  | 0.14 | 0.51 |

#### **$\lambda$ -cyhalothrin**

|   |                               |      |                 |      |                               |      |                               |      |      |
|---|-------------------------------|------|-----------------|------|-------------------------------|------|-------------------------------|------|------|
| 1 | <i>RPL10</i>                  | 0.05 | <i>RPL32</i>    | 0.01 | <i>RPL10</i>                  | 0.01 | <i>EF1<math>\alpha</math></i> | 0.00 | 0.02 |
| 2 | <i>RPL32</i>                  | 0.05 | <i>RPS11</i>    | 0.01 | <i>RPL32</i>                  | 0.01 | <i>RPL32</i>                  | 0.01 | 0.05 |
| 3 | <i>RPS11</i>                  | 0.05 | <i>RPL10</i>    | 0.02 | <i>EF2</i>                    | 0.02 | <i>EF2</i>                    | 0.01 | 0.06 |
| 4 | <i>EF1<math>\alpha</math></i> | 0.05 | <i>Ferritin</i> | 0.02 | <i>EF1<math>\alpha</math></i> | 0.02 | <i>Ferritin</i>               | 0.01 | 0.06 |
| 5 | <i>Ferritin</i>               | 0.05 | <i>RPS15</i>    | 0.02 | <i>Ferritin</i>               | 0.02 | <i>RPL10</i>                  | 0.02 | 0.08 |

|    |                                 |      |                                 |      |                                 |      |                                 |      |      |
|----|---------------------------------|------|---------------------------------|------|---------------------------------|------|---------------------------------|------|------|
| 6  | <i>RPL8</i>                     | 0.05 | <i>RPL8</i>                     | 0.02 | <i>RPS11</i>                    | 0.03 | <i>RPS11</i>                    | 0.02 | 0.09 |
| 7  | <i>EF2</i>                      | 0.05 | <i>EF1<math>\alpha</math></i>   | 0.02 | <i>RPL8</i>                     | 0.03 | <i>RPS20</i>                    | 0.03 | 0.11 |
| 8  | <i>RPS15</i>                    | 0.06 | <i>EF2</i>                      | 0.03 | <i>RPS15</i>                    | 0.03 | <i>AK</i>                       | 0.03 | 0.13 |
| 9  | <i><math>\beta</math>-actin</i> | 0.06 | <i><math>\beta</math>-actin</i> | 0.03 | <i><math>\beta</math>-actin</i> | 0.03 | <i>RPL8</i>                     | 0.03 | 0.14 |
| 10 | <i>AK</i>                       | 0.07 | <i>AK</i>                       | 0.04 | <i>AK</i>                       | 0.04 | <i><math>\beta</math>-actin</i> | 0.03 | 0.15 |
| 11 | <i>RPS20</i>                    | 0.07 | <i>RPS20</i>                    | 0.05 | <i>RPS20</i>                    | 0.04 | <i>RPS15</i>                    | 0.03 | 0.15 |
| 12 | <i>GST</i>                      | 0.08 | <i>GST</i>                      | 0.06 | <i>GST</i>                      | 0.04 | <i>GST</i>                      | 0.05 | 0.21 |
| 13 | <i><math>\beta</math>-TUB</i>   | 0.08 | <i><math>\beta</math>-TUB</i>   | 0.07 | <i><math>\beta</math>-TUB</i>   | 0.05 | <i><math>\alpha</math>-TUB</i>  | 0.06 | 0.22 |
| 14 | <i><math>\alpha</math>-TUB</i>  | 0.11 | <i><math>\alpha</math>-TUB</i>  | 0.11 | <i><math>\alpha</math>-TUB</i>  | 0.06 | <i><math>\beta</math>-TUB</i>   | 0.06 | 0.23 |
| 15 | <i>GAPDH</i>                    | 0.17 | <i>GAPDH</i>                    | 0.17 | <i>GAPDH</i>                    | 0.07 | <i>GAPDH</i>                    | 0.13 | 0.57 |

**Abamectin**

|   |                               |      |                               |      |                               |      |                               |      |      |
|---|-------------------------------|------|-------------------------------|------|-------------------------------|------|-------------------------------|------|------|
| 1 | <i>RPL10</i>                  | 0.07 | <i>RPS15</i>                  | 0.01 | <i>GAPDH</i>                  | 0.01 | <i>RPS15</i>                  | 0.01 | 0.05 |
| 2 | <i>RPS15</i>                  | 0.07 | <i>RPL10</i>                  | 0.01 | <i>RPL10</i>                  | 0.01 | <i>RPL10</i>                  | 0.01 | 0.06 |
| 3 | <i>GAPDH</i>                  | 0.08 | <i>EF1<math>\alpha</math></i> | 0.02 | <i>RPS15</i>                  | 0.02 | <i>GAPDH</i>                  | 0.01 | 0.06 |
| 4 | <i>RPL32</i>                  | 0.08 | <i>GAPDH</i>                  | 0.02 | <i>RPL32</i>                  | 0.02 | <i>RPL32</i>                  | 0.02 | 0.09 |
| 5 | <i>EF1<math>\alpha</math></i> | 0.08 | <i>RPL32</i>                  | 0.03 | <i>RPS11</i>                  | 0.03 | <i>EF1<math>\alpha</math></i> | 0.02 | 0.11 |
| 6 | <i>EF2</i>                    | 0.09 | <i>EF2</i>                    | 0.04 | <i>EF1<math>\alpha</math></i> | 0.03 | <i>RPS11</i>                  | 0.03 | 0.16 |
| 7 | <i>RPS11</i>                  | 0.09 | <i>RPS11</i>                  | 0.06 | <i>Ferritin</i>               | 0.04 | <i>EF2</i>                    | 0.04 | 0.19 |
| 8 | <i>GST</i>                    | 0.09 | <i>GST</i>                    | 0.06 | <i>EF2</i>                    | 0.05 | <i>Ferritin</i>               | 0.05 | 0.23 |

|    |                                 |      |                                 |      |                                 |      |                                 |      |      |
|----|---------------------------------|------|---------------------------------|------|---------------------------------|------|---------------------------------|------|------|
| 9  | <i>Ferritin</i>                 | 0.10 | <i>Ferritin</i>                 | 0.08 | <i>GST</i>                      | 0.06 | <i>GST</i>                      | 0.05 | 0.24 |
| 10 | <i>AK</i>                       | 0.11 | <i>AK</i>                       | 0.09 | <i><math>\beta</math>-actin</i> | 0.06 | <i><math>\beta</math>-actin</i> | 0.06 | 0.33 |
| 11 | <i><math>\beta</math>-actin</i> | 0.11 | <i><math>\beta</math>-actin</i> | 0.09 | <i>RPL8</i>                     | 0.07 | <i>AK</i>                       | 0.07 | 0.36 |
| 12 | <i>RPL8</i>                     | 0.13 | <i>RPL8</i>                     | 0.11 | <i>AK</i>                       | 0.08 | <i>RPL8</i>                     | 0.08 | 0.39 |
| 13 | <i><math>\alpha</math>-TUB</i>  | 0.13 | <i><math>\alpha</math>-TUB</i>  | 0.12 | <i><math>\alpha</math>-TUB</i>  | 0.09 | <i><math>\alpha</math>-TUB</i>  | 0.09 | 0.35 |
| 14 | <i><math>\beta</math>-TUB</i>   | 0.15 | <i><math>\beta</math>-TUB</i>   | 0.14 | <i><math>\beta</math>-TUB</i>   | 0.09 | <i><math>\beta</math>-TUB</i>   | 0.10 | 0.44 |
| 15 | <i>RPS20</i>                    | 0.17 | <i>RPS20</i>                    | 0.16 | <i>RPS20</i>                    | 0.10 | <i>RPS20</i>                    | 0.11 | 0.54 |

**Matrine**

|    |                                 |      |                                 |      |                                 |      |                                 |      |      |
|----|---------------------------------|------|---------------------------------|------|---------------------------------|------|---------------------------------|------|------|
| 1  | <i>RPL10</i>                    | 0.09 | <i>RPL8</i>                     | 0.01 | <i>GST</i>                      | 0.01 | <i>RPL10</i>                    | 0.01 | 0.06 |
| 2  | <i>RPL8</i>                     | 0.09 | <i>RPL10</i>                    | 0.01 | <i>AK</i>                       | 0.01 | <i>RPL8</i>                     | 0.01 | 0.06 |
| 3  | <i>GAPDH</i>                    | 0.10 | <i>GAPDH</i>                    | 0.03 | <i>RPL8</i>                     | 0.03 | <i>AK</i>                       | 0.03 | 0.13 |
| 4  | <i>AK</i>                       | 0.10 | <i>AK</i>                       | 0.04 | <i>RPL10</i>                    | 0.03 | <i>GAPDH</i>                    | 0.03 | 0.14 |
| 5  | <i>GST</i>                      | 0.10 | <i>GST</i>                      | 0.05 | <i>Ferritin</i>                 | 0.05 | <i>GST</i>                      | 0.04 | 0.16 |
| 6  | <i><math>\beta</math>-actin</i> | 0.10 | <i><math>\beta</math>-actin</i> | 0.05 | <i>EF1<math>\alpha</math></i>   | 0.05 | <i>RPS15</i>                    | 0.04 | 0.16 |
| 7  | <i>RPS15</i>                    | 0.10 | <i>RPS15</i>                    | 0.05 | <i>RPS15</i>                    | 0.06 | <i><math>\beta</math>-actin</i> | 0.05 | 0.20 |
| 8  | <i>EF2</i>                      | 0.11 | <i>EF2</i>                      | 0.07 | <i>GAPDH</i>                    | 0.07 | <i>EF2</i>                      | 0.05 | 0.23 |
| 9  | <i>RPS20</i>                    | 0.12 | <i>RPS20</i>                    | 0.08 | <i><math>\beta</math>-actin</i> | 0.07 | <i>RPS20</i>                    | 0.06 | 0.24 |
| 10 | <i>Ferritin</i>                 | 0.13 | <i>Ferritin</i>                 | 0.10 | <i>EF2</i>                      | 0.08 | <i>EF1<math>\alpha</math></i>   | 0.07 | 0.32 |
| 11 | <i>EF1<math>\alpha</math></i>   | 0.13 | <i>EF1<math>\alpha</math></i>   | 0.10 | <i>RPS20</i>                    | 0.08 | <i>Ferritin</i>                 | 0.07 | 0.26 |



|    |              |      |              |      |              |      |              |      |      |
|----|--------------|------|--------------|------|--------------|------|--------------|------|------|
| 12 | <i>α-TUB</i> | 0.15 | <i>α-TUB</i> | 0.12 | <i>RPL32</i> | 0.09 | <i>RPL32</i> | 0.08 | 0.40 |
| 13 | <i>RPL32</i> | 0.15 | <i>RPL32</i> | 0.12 | <i>α-TUB</i> | 0.10 | <i>α-TUB</i> | 0.09 | 0.31 |
| 14 | <i>EF2</i>   | 0.65 | <i>RPS11</i> | 0.18 | <i>RPS11</i> | 0.11 | <i>RPS11</i> | 0.11 | 0.46 |
| 15 | <i>α-TUB</i> | 0.84 | <i>β-TUB</i> | 0.22 | <i>β-TUB</i> | 0.13 | <i>β-TUB</i> | 0.16 | 0.66 |

**Table S4. Comprehensive gene stability ranking of 15 candidate reference genes in all samples was calculated using RefFinder. The Genes Geomean of ranking values is listed, and the stability decreased from top to bottom.**

| Rank | Insecticide treatment |       | Temperatures    |       | Odor stimulation |       | Developmental stages |       | Both sexes      |      | All samples     |       |
|------|-----------------------|-------|-----------------|-------|------------------|-------|----------------------|-------|-----------------|------|-----------------|-------|
|      | Gene                  | GM    | Gene            | GM    | Gene             | GM    | Gene                 | GM    | Gene            | GM   | Gene            | GM    |
| 1    | <i>EF2</i>            | 2.21  | <i>EF1a</i>     | 1.73  | <i>EF1a</i>      | 2.34  | <i>Actin</i>         | 1.5   | <i>Actin</i>    | 1.5  | <i>EF2</i>      | 2     |
| 2    | <i>RPL32</i>          | 3.6   | <i>Actin</i>    | 2.21  | <i>RPL8</i>      | 3.16  | <i>EF2</i>           | 2     | <i>RPS15</i>    | 2.63 | <i>RPL8</i>     | 2.78  |
| 3    | <i>GAPDH</i>          | 3.98  | <i>RPL32</i>    | 2.83  | <i>Ferritin</i>  | 3.44  | <i>RPS15</i>         | 4.36  | <i>RPL8</i>     | 3.64 | <i>GST</i>      | 2.94  |
| 4    | <i>EF1a</i>           | 5.03  | <i>RPL8</i>     | 3.94  | <i>Actin</i>     | 4.03  | <i>GST</i>           | 4.56  | <i>Ferritin</i> | 3.71 | <i>Ferritin</i> | 3.66  |
| 5    | <i>GST</i>            | 5.07  | <i>Ferritin</i> | 4.14  | <i>EF2</i>       | 4.16  | <i>RPS11</i>         | 5.01  | <i>AK-1</i>     | 3.98 | <i>GAPDH</i>    | 4.03  |
| 6    | <i>α-TUB</i>          | 5.18  | <i>EF2</i>      | 4.7   | <i>α-TUB</i>     | 5.2   | <i>RPS20</i>         | 5.48  | <i>RPS20</i>    | 4.76 | <i>RPS15</i>    | 4.53  |
| 7    | <i>RPS15</i>          | 5.18  | <i>RPL10</i>    | 6.82  | <i>GAPDH</i>     | 5.58  | <i>β-TUB</i>         | 6.45  | <i>GST</i>      | 6.05 | <i>EF1a</i>     | 7     |
| 8    | <i>RPL8</i>           | 5.90  | <i>GAPDH</i>    | 7.14  | <i>RPS15</i>     | 6.48  | <i>RPL10</i>         | 7.01  | <i>RPL32</i>    | 6.82 | <i>RPS11</i>    | 7.71  |
| 9    | <i>AK-1</i>           | 6.12  | <i>AK-1</i>     | 8.61  | <i>RPL10</i>     | 7.2   | <i>Ferritin</i>      | 7.48  | <i>EF1a</i>     | 7.75 | <i>RPL10</i>    | 9.01  |
| 10   | <i>β-TUB</i>          | 6.85  | <i>RPS11</i>    | 9.43  | <i>AK-1</i>      | 7.2   | <i>EF1a</i>          | 7.97  | <i>RPS11</i>    | 9.49 | <i>RPS20</i>    | 9.39  |
| 11   | <i>Ferritin</i>       | 8.68  | <i>RPS15</i>    | 10.22 | <i>β-TUB</i>     | 8.24  | <i>GAPDH</i>         | 9.43  | <i>GAPDH</i>    | 11   | <i>AK-1</i>     | 9.43  |
| 12   | <i>RPL10</i>          | 9.19  | <i>RPS20</i>    | 12    | <i>GST</i>       | 11.98 | <i>RPL8</i>          | 9.72  | <i>RPL10</i>    | 12   | <i>Actin</i>    | 10.47 |
| 13   | <i>Actin</i>          | 12.24 | <i>α-TUB</i>    | 13.24 | <i>RPS11</i>     | 13.24 | <i>AK-1</i>          | 13.24 | <i>β-TUB</i>    | 13   | <i>β-TUB</i>    | 10.61 |
| 14   | <i>RPS11</i>          | 14    | <i>GST</i>      | 13.74 | <i>RPS20</i>     | 13.47 | <i>RPL32</i>         | 13.74 | <i>EF2</i>      | 14   | <i>α-TUB</i>    | 14    |
| 15   | <i>RPS20</i>          | 15    | <i>β-TUB</i>    | 15    | <i>RPL32</i>     | 15    | <i>α-TUB</i>         | 15    | <i>α-TUB</i>    | 15   | <i>RPL32</i>    | 15    |

| Rank | Imidacloprid          |       | Thiamethoxam          |       | $\lambda$ -cyhalothrin |      | Abamectin             |       | Matrine               |       |
|------|-----------------------|-------|-----------------------|-------|------------------------|------|-----------------------|-------|-----------------------|-------|
|      | Gene                  | GM    | Gene                  | GM    | Gene                   | GM   | Gene                  | GM    | Gene                  | GM    |
| 1    | <i>RPL10</i>          | 1.57  | <i>RPL10</i>          | 1.78  | <i>RPL32</i>           | 1.19 | <i>RPS15</i>          | 1.32  | <i>RPL10</i>          | 1.68  |
| 2    | <i>RPS15</i>          | 2.06  | <i>AK-1</i>           | 2.21  | <i>RPL10</i>           | 2.34 | <i>RPL10</i>          | 1.68  | <i>RPL8</i>           | 1.86  |
| 3    | <i>AK-1</i>           | 2.21  | <i>RPS11</i>          | 2.71  | <i>EF1a</i>            | 3.25 | <i>GAPDH</i>          | 2.45  | <i>AK-1</i>           | 2.83  |
| 4    | <i>GST</i>            | 2.99  | <i>RPS15</i>          | 2.83  | <i>RPS11</i>           | 3.83 | <i>RPL32</i>          | 4.23  | <i>GST</i>            | 3.5   |
| 5    | <i>GAPDH</i>          | 4.73  | <i>GAPDH</i>          | 3.34  | <i>Ferritin</i>        | 4.16 | <i>EF1a</i>           | 4.61  | <i>GAPDH</i>          | 3.83  |
| 6    | <i>EF2</i>            | 6.74  | <i>EF1a</i>           | 6.48  | <i>EF2</i>             | 5.09 | <i>RPS11</i>          | 6.19  | <i>RPS15</i>          | 6.44  |
| 7    | <i>RPS20</i>          | 7.14  | <i>Actin</i>          | 6.48  | <i>RPL8</i>            | 6.9  | <i>EF2</i>            | 6.7   | <i>Actin</i>          | 6.9   |
| 8    | <i>EF1a</i>           | 7.74  | $\beta$ - <i>TUB</i>  | 8.49  | <i>RPS15</i>           | 7.52 | <i>GST</i>            | 8.24  | <i>Ferritin</i>       | 8.41  |
| 9    | $\alpha$ - <i>TUB</i> | 8.13  | <i>RPS20</i>          | 8.71  | <i>AK-1</i>            | 9.46 | <i>Ferritin</i>       | 8.45  | <i>EF2</i>            | 8.46  |
| 10   | <i>RPL8</i>           | 10.72 | <i>GST</i>            | 9.74  | <i>Actin</i>           | 9.46 | <i>Actin</i>          | 10.49 | <i>EF1a</i>           | 9.45  |
| 11   | <i>RPS11</i>          | 10.74 | <i>RPL32</i>          | 11.68 | <i>RPS20</i>           | 9.82 | <i>AK-1</i>           | 10.72 | <i>RPS20</i>          | 9.46  |
| 12   | <i>Ferritin</i>       | 11.93 | <i>EF2</i>            | 12.2  | <i>GST</i>             | 12   | <i>RPL8</i>           | 11.74 | <i>RPL32</i>          | 12.49 |
| 13   | $\beta$ - <i>TUB</i>  | 12.72 | <i>RPL8</i>           | 12.49 | $\beta$ - <i>TUB</i>   | 13   | $\alpha$ - <i>TUB</i> | 13    | $\alpha$ - <i>TUB</i> | 12.49 |
| 14   | <i>RPL32</i>          | 13.74 | $\alpha$ - <i>TUB</i> | 13.98 | $\alpha$ - <i>TUB</i>  | 14   | $\beta$ - <i>TUB</i>  | 14    | <i>RPS11</i>          | 14    |
| 15   | <i>Actin</i>          | 15    | <i>Ferritin</i>       | 14.47 | <i>GAPDH</i>           | 15   | <i>RPS20</i>          | 15    | $\beta$ - <i>TUB</i>  | 15    |

Note: GM, geometric mean

**Table S5. FPKM values of *B. gobica* nymphs and adults before and after imidacloprid treatment in the transcriptome data. FPKM: fragments per kilobase of exon model per million mapped reads.**

| Sample names                          | FPKM values |          |          |
|---------------------------------------|-------------|----------|----------|
|                                       | Repeat 1    | Repeat 2 | Repeat 3 |
| Nymphs without imidacloprid treatment | 2.86        | 2.11     | 0.24     |
| Nymphs with imidacloprid treatment    | 0.90        | 1.50     | 1.74     |

|                                       |       |      |       |
|---------------------------------------|-------|------|-------|
| Adults without imidacloprid treatment | 11.43 | 7.10 | 11.77 |
|---------------------------------------|-------|------|-------|

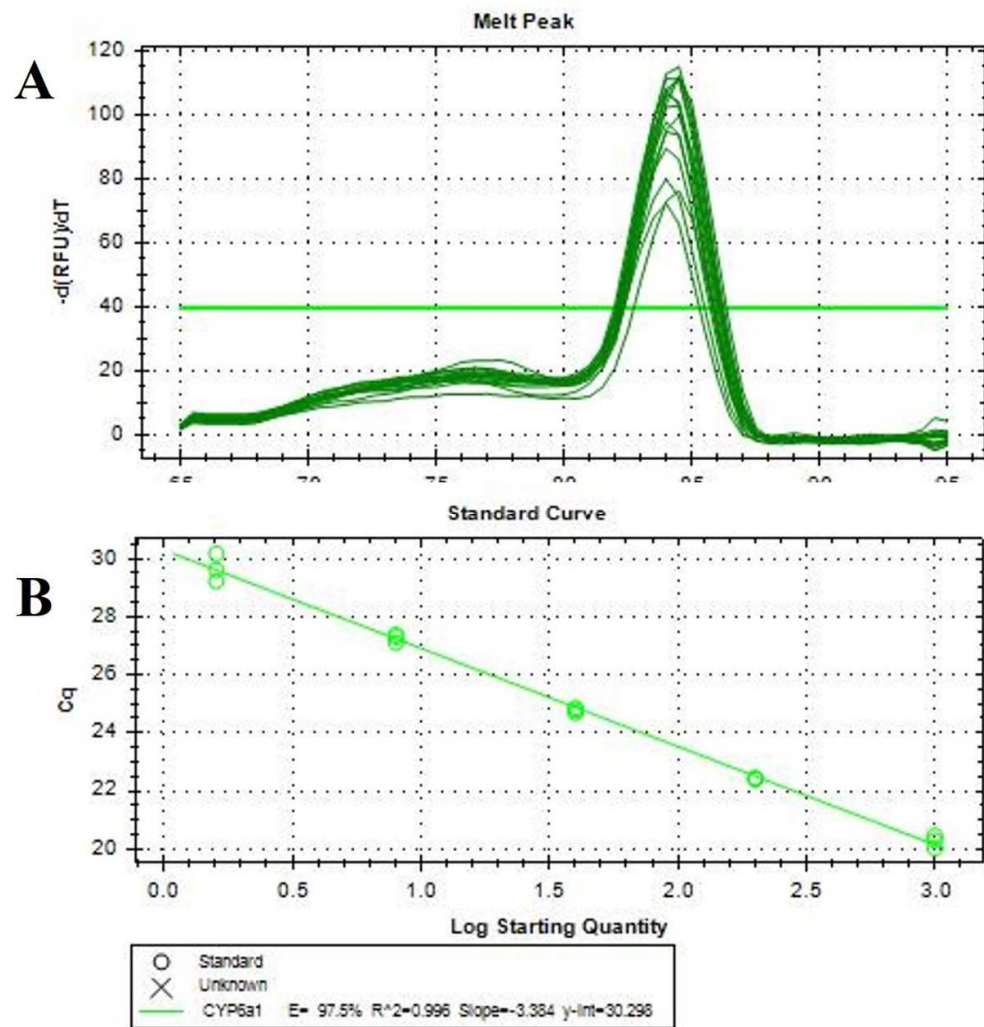

Figure S1. Specificity and amplification efficiency of primer pairs of target gene *CYP6a1* by RT-qPCR in *B. gobica*. A: The melt peaks of primers of *CYP6a1*. B: The standard curve of primers of *CYP6a1*.
